CORRECTION

# Correction: Beyond convexity—Contraction and global convergence of gradient descent

The *PLOS ONE* Staff

## Notice of republication

This article was republished on September 24<sup>th</sup>, 2020, to correct errors in equations that were introduced during the typesetting process. The publisher apologizes for the errors. Please download this article again to view the correct version. The originally published, uncorrected article and the republished, corrected articles are provided here for reference.

## Supporting information

**S1 File. Originally published, uncorrected article.**

(PDF)

**S2 File. Republished, corrected article.**

(PDF)

## Reference

1. Wensing PM, Slotine J-J (2020) Beyond convexity—Contraction and global convergence of gradient descent. *PLoS ONE* 15(8): e0236661. <https://doi.org/10.1371/journal.pone.0236661> PMID: 32750097

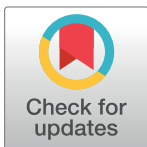

## OPEN ACCESS

**Citation:** The *PLOS ONE* Staff (2020) Correction: Beyond convexity—Contraction and global convergence of gradient descent. *PLoS ONE* 15(12): e0243330. <https://doi.org/10.1371/journal.pone.0243330>

**Published:** December 3, 2020

**Copyright:** © 2020 The PLOS ONE Staff. This is an open access article distributed under the terms of the [Creative Commons Attribution License](https://creativecommons.org/licenses/by/4.0/), which permits unrestricted use, distribution, and reproduction in any medium, provided the original author and source are credited.
